# Supplementary material for: Effects of Dietary Callicarpa nudiflora Aqueous Extract Supplementation on Growth Performance, Growth Hormone, Antioxidant and Immune Function, and Intestinal Health of Broilers
Source: MDPI journal article supplement (doi:10.3390/antiox13050572), 2024-05-06
Supplement: s1 [file s1]

## Supplementary information

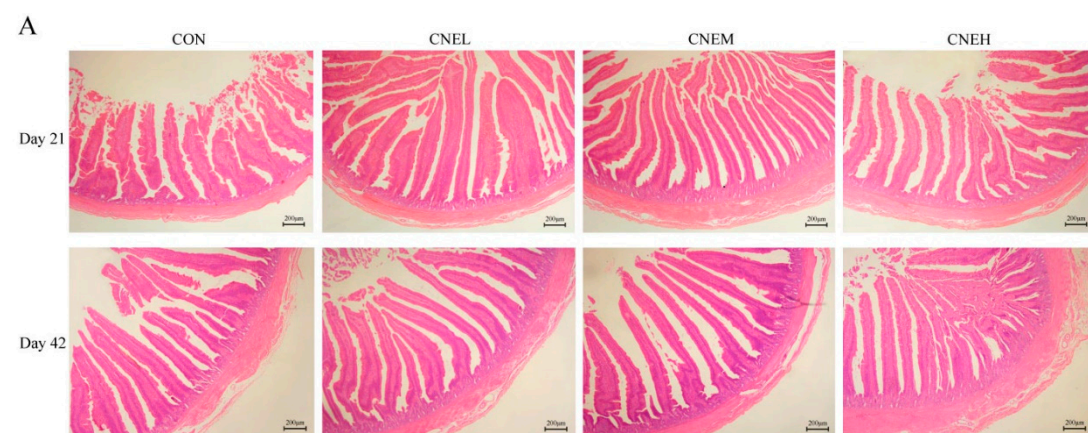

Figure S1: The jejunal tissues of broilers were stained with H&E. Scale bar: 200  $\mu$ m. (A) Microvillus morphology of the jejunum in 21- and 42-day-old broilers. CON, control group, basal diet; CNEL, the control diet + 300 mg/kg of CNE; CNEM, the control diet + 500 mg/kg of CNE; CNEH, the control diet + 700 mg/kg of CNE.

Table S1: The gradient elution procedure of HPLC.

| Time (min) | mobile phase: A (%) | mobile phase: B (%) |
|------------|---------------------|---------------------|
| 0~10       | 40~50               | 60~50               |
| 10~15      | 50~60               | 50~40               |
| 15~25      | 60~70               | 40~30               |

Table S2: The commercial kits information.

| Items         | Name of kits                                                       | Cat. No.   |
|---------------|--------------------------------------------------------------------|------------|
| Phenol        | Plant total phenol test kit                                        | A143-1-1   |
| Flavonoid     | Plant flavonoids test kit                                          | A142-1-1   |
| GH            | Chicken growth hormone (GH) ELISA Kit                              | mIC60198-1 |
| IGF-1         | Chicken insulin-like growth factor 1 (IGF-1) ELISA kit             | mIC60241-1 |
| IgA           | Chicken immunoglobulin A (IgA) ELISA kit                           | mIC60450-1 |
| IgM           | Chicken immunoglobulin M (IgM) ELISA kit                           | mIC60244-1 |
| IL-6          | Chicken interleukin-6 (IL-6) ELISA kit                             | mIC60293-1 |
| IL-10         | Chicken interleukin-10 (IL-10) ELISA kit                           | mIC60245-1 |
| TNF- $\alpha$ | Chicken tumor necrosis factor- $\alpha$ (TNF- $\alpha$ ) ELISA kit | mIC60499-1 |
| MDA           | Malondialdehyde (MDA) assay kit (TBA method)                       | A003-1-2   |
| GSH-Px        | Glutathione peroxidase (GSH-PX) assay kit (Colorimetric method)    | A005-1-2   |
| SOD           | Superoxide Dismutase (SOD) assay kit (Hydroxylamine method)        | A001-2-2   |
| T-AOC         | Total antioxidant capacity (T-AOC) assay kit (ABTS method)         | A015-2-1   |

GH, growth hormone; IGF-1, insulin-like growth factor 1; IgA, immunoglobulin A; IgM, immunoglobulin M; IL-6, interleukin-6; IL-10, interleukin-10; TNF- $\alpha$ , tumor necrosis factor- $\alpha$ ; MDA, malondialdehyde; GSH-Px, glutathione peroxidase; SOD, superoxide dismutase; T-AOC, total antioxidant capacity.

Table S3: The ingredient and nutrient composition of the basal diet.

| Component               | Days 1~21 | Days 22~42 |
|-------------------------|-----------|------------|
| Ingredient (%)          |           |            |
| Corn                    | 55.21     | 62.21      |
| Soybean meal            | 36.40     | 29.20      |
| soybean oil             | 4.70      | 4.90       |
| Limestone               | 1.52      | 1.60       |
| CaHPO <sub>4</sub>      | 1.00      | 1.00       |
| L-Lysine                | 0.35      | 0.30       |
| Methionine              | 0.16      | 0.13       |
| L-Threonine             | 0.06      | 0.06       |
| Salt                    | 0.30      | 0.30       |
| Premix 1                | 0.30      | 0.30       |
| Total                   | 100.00    | 100.00     |
| Nutrient levels 2       |           |            |
| Metabolic energy, MJ/kg | 12.72     | 13.02      |
| Curde protein, %        | 20.65     | 18.28      |
| Lysine, %               | 1.27      | 1.09       |
| Methionine, %           | 0.47      | 0.41       |
| Calcium, %              | 0.90      | 0.91       |
| Available P, %          | 0.54      | 0.52       |

1 Premix is supplied per kg of diet: vitamin A 12000 IU, vitamin D 32500 IU, vitamin E 20.0 mg, vitamin K3 3.0 mg, vitamin B1 3.0 mg, vitamin B2 8.0 mg, vitamin B6 7.0 mg, vitamin B12 0.03 mg, pantothenic acid 20.0 mg, niacin 50.0 mg, biotin 0.1 mg, folic acid 1.5 mg, Fe 45 mg, Cu 17.5 mg, I 1.5 mg, Zn 105 mg, Mn 124 mg, Se 15 mg.

2 Nutrient level is calculated value.

Table S4: Primers used for quantitative PCR.

| Gene           | Primer sequence (5'→3')                                          | Accession number |
|----------------|------------------------------------------------------------------|------------------|
| $\beta$ -actin | Forward: GAGAAATTGTGCGTGACATCA<br>Reverse: ACCTCTGTCATCTCTCCACA  | L08165.1         |
| IL-1 $\beta$   | Forward: CAGCCTCAGCGAAGAGACCTT<br>Reverse: ACTGTGGTGTGCTCAGAATCC | NM_204524.2      |
| IL-6           | Forward: AAATCCCTCCTCGCCAATCT<br>Reverse: CCCTCACGGTCTTCTCCATAAA | HM179640         |
| IL-10          | Forward: CGCTGTCACCGCTTCTTCA<br>Reverse: TCCCGTTCTCATCCATCTTCTC  | AJ621614         |
| IFN- $\gamma$  | Forward: AGCCGCACATCAAACACATA<br>Reverse: CGCTGGATTCTCAAGTCGTT   | NM_205149.1      |
| TLR4           | Forward: AGGCACCTGAGCTTTTCCTC<br>Reverse: TACCAACGTGAGGTTGAGCC   | NM_001030693.1   |
| Myd88          | Forward: ATCCGGACACTAGAGGGAGG<br>Reverse: GGCAGAGCTCAGTGTCCATT   | NM_001030962.1   |
| NF- $\kappa$ B | Forward: GTGTGAAGAAACGGGAAGCTG<br>Reverse: GGCACGGTTGTCATAGATGG  | NM_205129        |
| CAT            | Forward: GGTTCCGGTGGGGTGTCTTT<br>Reverse: CACCAGTGGTCAAGGCATCT   | NM_001031215.2   |
| GSH-Px         | Forward: GACCAACCCGCGAGTACATCA<br>Reverse: GAGGTGCGGGCTTTCTTTA   | NM_001277853.2   |
| SOD1           | Forward: ATTACCGGCTTGTCTGATGG<br>Reverse: CCTCCCTTTGCAGTCACATT   | NM_205064.155    |
| Nrf2           | Forward: CGCTTTCTTCAGGGGTAGCA<br>Reverse: AGTTCGGTGCAGAAGAGGTG   | NM_205117.1      |
| HO-1           | Forward: ACGAGTTCAAGCTGGTCACG<br>Reverse: GGATGCTTCTTGCCAACGAC   | NM_205344.1      |
| NQO1           | Forward: GGCAATGGCAGCAGCAG<br>Reverse: AAGCACTCGGGGTCTTGAG       | NM_001277621.1   |
| IGF-2          | Forward: CCTTCCTGGCCTATGCGTTG<br>Reverse: TCACAGCTCCGAAAGCAGCA   | NM_001030342     |
| GH             | Forward: TACGGCCTGCTGTCCTGCTT<br>Reverse: TGTTTTTGGTGACGGGGAGG   | NM_204359        |
| GLP-2          | Forward: AAGCTTCCCAGTCTGAACCA<br>Reverse: ATCCTGAGCTCGTCTGCTGT   | NM_001190165.3   |
| Claudin-1      | Forward: CTGCTCACCCCTCATTGGAG<br>Reverse: GCTGAACTCACTCTTGGGCT   | NM_001277622.1   |
| Occludin       | Forward: CCGTAACCCCGAGTTGGAT<br>Reverse: ATTGAGGCGGTCGTTGATG     | NM_205128.1      |
| ZO-1           | Forward: TGTAGCCACAGCAAGAGGTG<br>Reverse: CTGGAATGGCTCCTTGTGGT   | XM_413773.4      |
| EAAT3          | Forward: ACCCCCTTCTGATCACCTCT<br>Reverse: TGAGCATGCTGATTCCAAAG   | XM_424930.6      |

|       |                               |             |
|-------|-------------------------------|-------------|
| GLUT2 | Forward: CCGCAGAAGGTGATAGAAGC | NM_205129.1 |
|       | Reverse: ATTGTCCCTGGAGGTGTT   |             |
| PePT1 | Forward: TCACTGTTGGCATGTTCCCT | NM_204365.2 |
|       | Reverse: TTCGCATTGCTATCACCTA  |             |

---

Abbreviations: IL-1 $\beta$ : interleukin-1 $\beta$ ; IL-6: interleukin-6; IL-10: interleukin-10; IFN- $\gamma$ : interferon- $\gamma$ ; TLR4: Toll-like receptor 4; Myd88: myeloid differentiation factor 88; NF- $\kappa$ B: nuclear factor kappa B p65; CAT: catalase; GSH-Px: glutathione peroxidase; SOD1: copper and zinc superoxide dismutase; Nrf2: nuclear factor erythroid 2-related factor 2; HO-1: heme oxygenase-1; NQO1: NADPH dehydrogenase 1; IGF-2: insulin-like growth factor 2; GH: growth hormone; GLP-2: glucagon-like peptide 2; ZO-1: zonula occludens 1; EAAT3: excitatory amino acid transporter 3; GLUT2: glucose transporter 2; PePT1: peptide transporter 1.
